# Supplementary material for: Global analysis of X-chromosome dosage compensation
Source: PubMed Central journal article supplement (PMC1414069; doi:10.1186/jbiol30), 2006-02-16
Supplement: jbiol30-s1.pdf [file jbiol30-s1.pdf]

### Additional data file 1

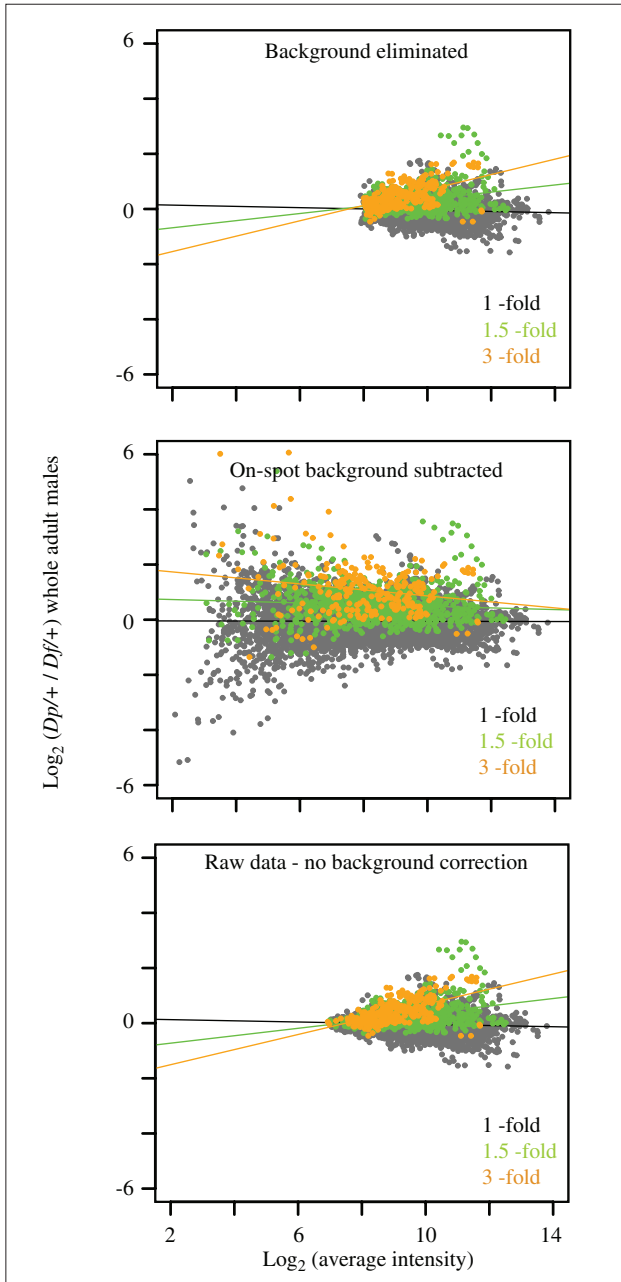

**Figure**  
Effect of background correction method on fold changes in expression ratios. Data were normalized by print-tip loess within each array, and background corrected by one of the following methods: (a) background elimination, (b) on-spot background subtraction, (c) no background correction. Background correction impacts the absolute values of expression ratios. The on-spot background correction which maximizes differences in the data is used in our analyses.
