# Supplementary material for: Global analysis of X-chromosome dosage compensation
Source: PubMed Central journal article supplement (PMC1414069; doi:10.1186/jbiol30), 2006-02-16
Supplement: jbiol30-s2.pdf [file jbiol30-s2.pdf]

**Additional data file 2**

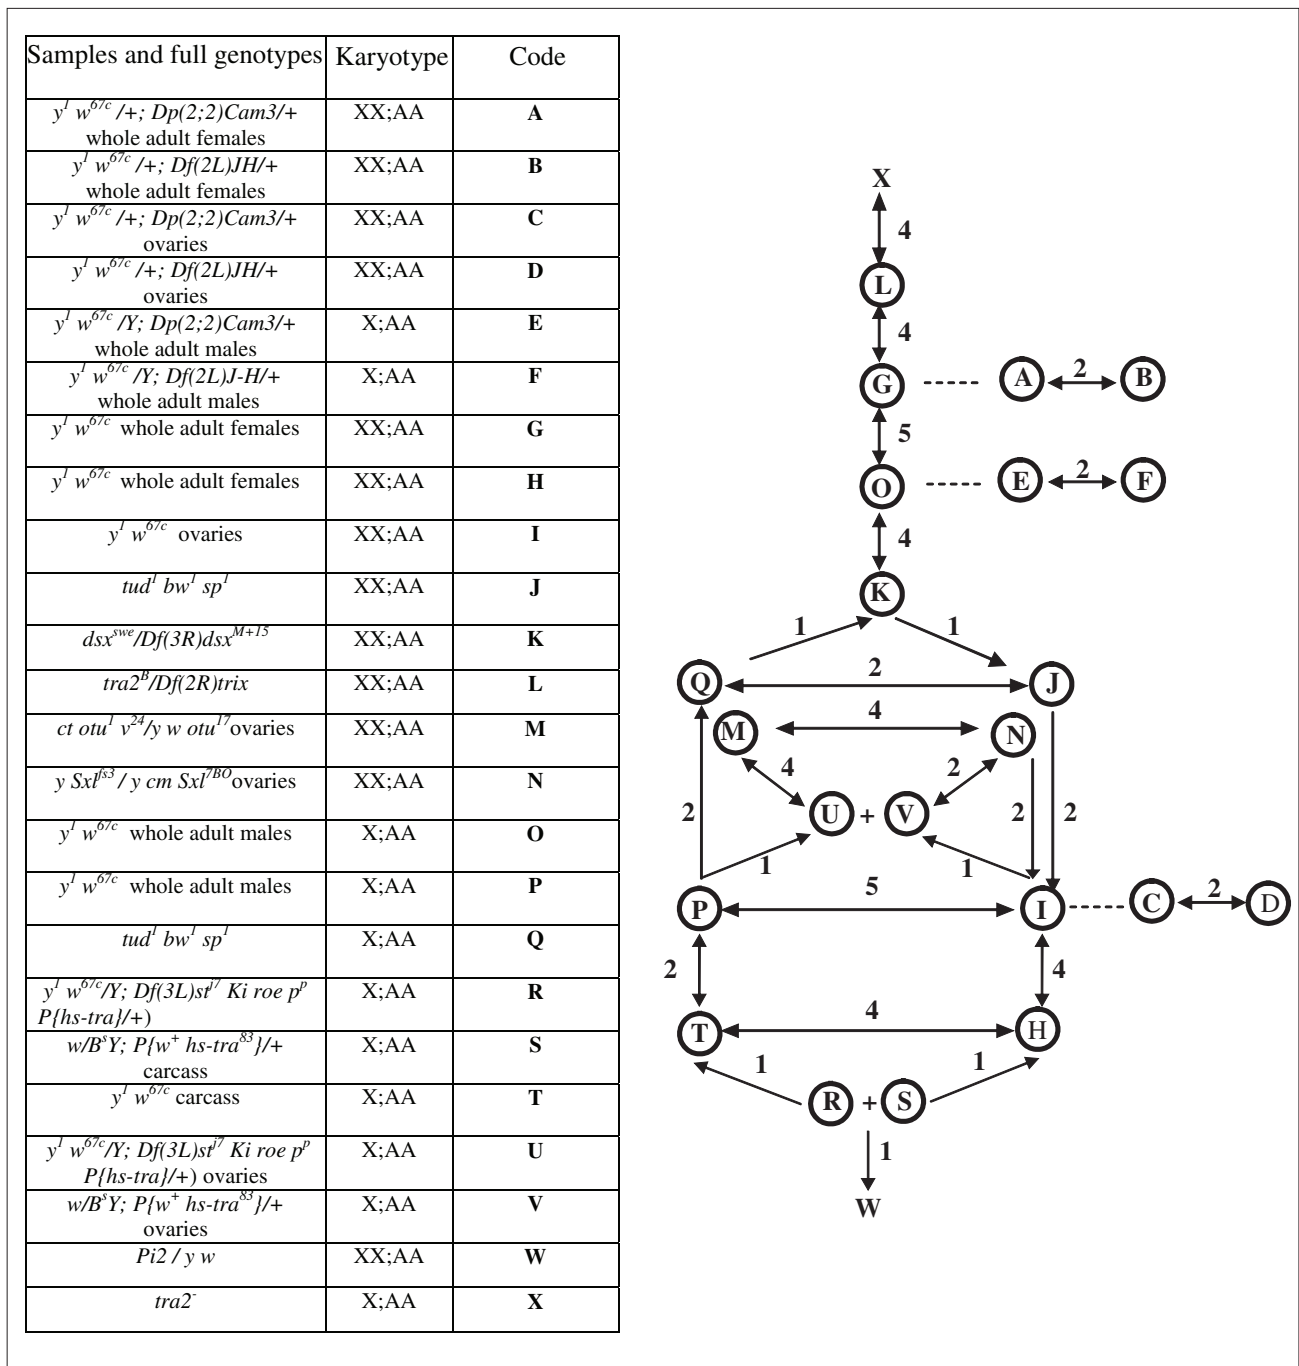

**Figure**  
The experimental design.
