# Supplementary material for: Global analysis of X-chromosome dosage compensation
Source: PubMed Central journal article supplement (PMC1414069; doi:10.1186/jbiol30), 2006-02-16
Supplement: jbiol30-s3.pdf [file jbiol30-s3.pdf]

**Additional data file 3 - Table 1**

**One-way ANOVA comparing expression ratios of XX;AA (*otu<sup>1</sup>/otu<sup>17</sup>*) vs. X;AA (*hs-tra/+*) transformed ovaries.**

| ANOVA cell 1                 | ANOVA cell 2     | ANOVA cell 3     |
|------------------------------|------------------|------------------|
| pooled ( <i>Dp/+</i> )/(+/+) | pooled AA/AA     | XX/X             |
| 1.5-fold gene dose           | 1-fold gene dose | 2-fold gene dose |

| Pair-wise comparisons           | Mean expression ratio difference and 95% CI |
|---------------------------------|---------------------------------------------|
| ( <i>Dp/+</i> )/(+/+) vs. AA/AA | 0.4530 [0.4217, 0.4842]                     |
| ( <i>Dp/+</i> )/(+/+) vs. XX/X  | 0.2808 [0.2496, 0.3121]                     |
| XX/X vs. AA/AA                  | 0.1722 [0.1409, 0.2034]                     |

(CI) Tukey HSD procedure confidence interval.

## Additional data file 3 - Table 2

### One-way ANOVA comparing expression ratios of XX;AA (*Sxl<sup>f53</sup>/Sxl<sup>7B0</sup>*) vs. X;AA (*hs-tra+*) transformed ovaries.

| ANOVA cell 1                 | ANOVA cell 2     | ANOVA cell 3     |
|------------------------------|------------------|------------------|
| pooled ( <i>Dp/+</i> )/(+/+) | pooled AA/AA     | XX/X             |
| 1.5-fold gene dose           | 1-fold gene dose | 2-fold gene dose |

| Pair-wise comparisons           | Mean expression ratio difference and 95% CI |
|---------------------------------|---------------------------------------------|
| ( <i>Dp/+</i> )/(+/+) vs. AA/AA | 0.4290 [0.3961, 0.4619]                     |
| ( <i>Dp/+</i> )/(+/+) vs. XX/X  | 0.3069 [0.2740, 0.3398]                     |
| XX/X vs. AA/AA                  | 0.1221 [0.0892, 0.1551]                     |

(CI) Tukey HSD procedure confidence interval.

### Additional data file 3 - Table 3

**One-way ANOVA comparing expression ratios of XX;AA (wildtype) ovaries vs. X;AA (wildtype) testes.**

| ANOVA cell 1        | ANOVA cell 2     | ANOVA cell 3     |
|---------------------|------------------|------------------|
| pooled (Dp/+)/(+/+) | pooled AA/AA     | XX/X             |
| 1.5-fold gene dose  | 1-fold gene dose | 2-fold gene dose |

| Pair-wise comparisons  | Mean expression ratio difference and 95% CI |
|------------------------|---------------------------------------------|
| (Dp/+)/(+/+) vs. AA/AA | 0.4530 [0.4073, 0.4987]                     |
| (Dp/+)/(+/+) vs. XX/X  | 0.0319 [-0.0138, 0.0776]                    |
| XX/X vs. AA/AA         | 0.4211 [0.3754, 0.4668]                     |

(CI) Tukey HSD procedure confidence interval.

### Additional data file 3 - Table 4

**One-way ANOVA for intensities from transformed X;AA *hs-tra* ovaries.**

| ANOVA cell 1         | ANOVA cell 2       | ANOVA cell 3 |
|----------------------|--------------------|--------------|
| <i>Dff+</i> (1-copy) | Autosomal (2-copy) | X (1-copy)   |

| Pair-wise comparison | Mean intensity difference and 95% CI |
|----------------------|--------------------------------------|
| <i>Dff+</i> vs. AA   | -0.7058 [-0.8793, -0.5324]           |
| <i>Dff+</i> vs. X    | -0.8740 [-1.0475, -0.7006]           |
| X vs. AA             | 0.1682 [0.0053, 0.3416]              |

(CI) Tukey HSD procedure confidence interval.

### Additional data file 3 - Table 5

#### One-way ANOVA for intensities from X;AA wildtype testes

| ANOVA cell 1          | ANOVA cell 2       | ANOVA cell 3 |
|-----------------------|--------------------|--------------|
| <i>Dff</i> + (1-copy) | Autosomal (2-copy) | X (1-copy)   |

  

| Pair-wise comparison | Mean intensity difference and 95% CI |
|----------------------|--------------------------------------|
| <i>Dff</i> + vs. AA  | -0.6785 [-0.8558, -0.5012]           |
| <i>Dff</i> + vs. X   | -0.7449 [-0.9222, -0.5676]           |
| X vs. AA             | -0.0664 [-0.2437, 0.1109]            |

(CI) Tukey HSD procedure confidence interval.

### Additional data file 3 - Table 6

**One-way ANOVA comparing hybridization intensities from *C. elegans* or mouse soma**

|                    |                       |
|--------------------|-----------------------|
| ANOVA cell 1       | ANOVA cell 2          |
| Autosomal (2-copy) | X chromosome (1-copy) |

| Tissue                 | Pair-wise comparison | Mean intensity difference and 95% CI |
|------------------------|----------------------|--------------------------------------|
| <i>C. elegans</i> soma | X vs. AA             | 0.3933 [0.3547, 0.4320]              |
| Mouse soma             | X vs. AA             | -0.1704 [-0.3128, 0.0280]            |
|                        | Chromosome 6 vs. AA  | -0.2919 [-0.4029, -0.1809]           |

(CI) Tukey HSD procedure confidence interval.
