# Supplementary material for: Global analysis of X-chromosome dosage compensation
Source: PubMed Central journal article supplement (PMC1414069; doi:10.1186/jbiol30), 2006-02-16
Supplement: jbiol30-s4.pdf [file jbiol30-s4.pdf]

### Additional data file 4 - Table 1

**HL estimation of median differences between expression ratios for XX;AA (*otu<sup>1</sup>lotu<sup>17</sup>*) vs. X;AA (*hs-tra<sup>+</sup>*) ovaries.**

| Distribution of ratios (group 1) | Distribution of ratios (group 2) | Median of distribution differences |
|----------------------------------|----------------------------------|------------------------------------|
| (Dp/+)/(+/+)                     | AA/AA                            | 0.3689                             |
| XX/X                             | AA/AA                            | 0.1739                             |

D (KS statistic) = 1 ( $p \ll 10^{-4}$ ) for the two distributions of differences.

## Additional data file 4 - Table 2

### HL estimation of median differences between expression ratios for **XX;AA** (*Sxl<sup>f53</sup>/Sxl<sup>7B0</sup>*) vs. **X;AA** (*hs-tra/+*) ovaries

| Distribution of ratios (group 1) | Distribution of ratios (group 2) | Median of distribution differences |
|----------------------------------|----------------------------------|------------------------------------|
| (Dp/+)/(+/+)                     | AA/AA                            | 0.3689                             |
| XX/X                             | AA/AA                            | 0.1553                             |

D (KS statistic) = 1 ( $p \ll 10^{-4}$ ) for the two distributions of differences

### Additional data file 4 - Table 3

**HL estimation of median differences between expression ratios for XX;AA (wild type) ovaries vs. X;AA (wild type) testes**

| Distribution of ratios (group 1) | Distribution of ratios (group 2) | Median of distribution differences |
|----------------------------------|----------------------------------|------------------------------------|
| (Dp/+)/(+/+)                     | AA/AA                            | 0.3689                             |
| XX/X                             | AA/AA                            | 0.5300                             |

D (KS statistic) = 1 ( $p < 10^{-4}$ ) for the two distributions of differences
