# Supplementary material for: Global analysis of X-chromosome dosage compensation
Source: PubMed Central journal article supplement (PMC1414069; doi:10.1186/jbiol30), 2006-02-16
Supplement: jbiol30-s5.pdf [file jbiol30-s5.pdf]

## Additional data file 5 - Table 1

### HL estimation of median differences for intensities from X;AA *hs-tra* ovaries.

| Distribution of intensities (group 1) | Distribution of intensities (group 2) | Median of distribution differences |
|---------------------------------------|---------------------------------------|------------------------------------|
| <i>Dff</i> +                          | AA                                    | -0.5581                            |
| X                                     | AA                                    | 0.1631                             |

D (KS statistic) = 1 ( $p \ll 10^{-4}$ ) for the two distributions of differences.

## Additional data file 5 - Table 2

### HL estimation of median differences for intensities from X;AA wild type testes.

| Distribution of intensities (group 1) | Distribution of intensities (group 2) | Median of distribution differences |
|---------------------------------------|---------------------------------------|------------------------------------|
| Df/+                                  | AA                                    | -0.558                             |
| X                                     | AA                                    | 0.0153                             |

D (KS statistic) = 1 ( $p \ll 10^{-4}$ ) for the two distributions of differences
