# Supplementary material for: Global analysis of X-chromosome dosage compensation
Source: PubMed Central journal article supplement (PMC1414069; doi:10.1186/jbiol30), 2006-02-16
Supplement: jbiol30-s6.pdf [file jbiol30-s6.pdf]

**Additional data file 6**



**Figure**

A simple picture of the Hodges-Lehmann estimate of median differences. Expression ratios (or hybridization intensities) are selected by bootstrap from each distribution. The differences between A and B and B and C are calculated and their distributions are shown. The median differences are indicated, which tell us whether B is closer to A or to C. Their distributions of differences A-B and C-B are compared by KS test, to check for overlap. The  $D$  statistics of 1 and  $p$ -value  $\ll 10^{-4}$  indicate no overlap between A-B and C-B, implying that the B distribution is much closer in median difference to A than it is to C.
